# Supplementary material for: Inkjet-Printed Temperature Sensors Characterized according to Standards
Source: MDPI journal article supplement (doi:10.3390/s22218145), 2022-10-24
Supplement: s1 [file s1]

# Inkjet-Printed Temperature Sensors Characterized According to Standards

**Table S1.** DoE with varying manufacturing parameters.

| Substrate | Printing Angle [°] | Sintering dwell time [h] | Heating rate [K/min] | Washing after sintering | Sintering temp. [°C/phot] | Coating | Name                  |
|-----------|--------------------|--------------------------|----------------------|-------------------------|---------------------------|---------|-----------------------|
| LCP       | 0                  | 1                        | 2                    | yes                     | 120                       | yes     | LCP 2 with coating    |
| LCP       | 0                  | 1                        | 2                    | yes                     | 120                       | no      | LCP 2 without coating |
| LCP       | 0                  | 1                        | 10                   | yes                     | 200/120+phot              | yes     | LCP 4 with coating    |
| LCP       | 0                  | 1                        | 10                   | yes                     | 200/120+phot              | no      | LCP 4 without coating |
| LCP       | 0                  | 24                       | 2                    | no                      | 120                       | yes     | LCP 5 with coating    |
| LCP       | 0                  | 24                       | 2                    | no                      | 120                       | no      | LCP 5 without coating |
| LCP       | 0                  | 24                       | 10                   | no                      | 200/120+phot              | yes     | LCP 7 with coating    |
| LCP       | 0                  | 24                       | 10                   | no                      | 200/120+phot              | no      | LCP 7 without coating |
| LCP       | 90                 | 1                        | 2                    | no                      | 200/120+phot              | yes     | LCP 6 with coating    |
| LCP       | 90                 | 1                        | 2                    | no                      | 200/120+phot              | no      | LCP 6 without coating |
| LCP       | 90                 | 1                        | 10                   | no                      | 120                       | yes     | LCP 8 with coating    |
| LCP       | 90                 | 1                        | 10                   | no                      | 120                       | no      | LCP 8 without coating |
| LCP       | 90                 | 24                       | 2                    | yes                     | 200/120+phot              | yes     | LCP 1 with coating    |
| LCP       | 90                 | 24                       | 2                    | yes                     | 200/120+phot              | no      | LCP 1 without coating |
| LCP       | 90                 | 24                       | 10                   | yes                     | 120                       | yes     | LCP 3 with coating    |
| LCP       | 90                 | 24                       | 10                   | yes                     | 120                       | no      | LCP 3 without coating |
| COC       | 0                  | 1                        | 2                    | no                      | 200/120+phot              | yes     | COC 6 with coating    |
| COC       | 0                  | 1                        | 2                    | no                      | 200/120+phot              | no      | COC 6 without coating |
| COC       | 0                  | 1                        | 10                   | no                      | 120                       | yes     | COC 8 with coating    |
| COC       | 0                  | 1                        | 10                   | no                      | 120                       | no      | COC 8 without coating |
| COC       | 0                  | 24                       | 2                    | yes                     | 200/120+phot              | yes     | COC 1 with coating    |
| COC       | 0                  | 24                       | 2                    | yes                     | 200/120+phot              | no      | COC 1 without coating |
| COC       | 0                  | 24                       | 10                   | yes                     | 120                       | yes     | COC 2 with coating    |
| COC       | 0                  | 24                       | 10                   | yes                     | 120                       | no      | COC 2 without coating |
| COC       | 90                 | 1                        | 2                    | yes                     | 120                       | yes     | COC 7 with coating    |
| COC       | 90                 | 1                        | 2                    | yes                     | 120                       | no      | COC 7 without coating |
| COC       | 90                 | 1                        | 10                   | yes                     | 200/120+phot              | yes     | COC 3 with coating    |
| COC       | 90                 | 1                        | 10                   | yes                     | 200/120+phot              | no      | COC 3 without coating |
| COC       | 90                 | 24                       | 2                    | no                      | 120                       | yes     | COC 5 with coating    |
| COC       | 90                 | 24                       | 2                    | no                      | 120                       | no      | COC 5 without coating |
| COC       | 90                 | 24                       | 10                   | no                      | 200/120+phot              | yes     | COC 4 with coating    |
| COC       | 90                 | 24                       | 10                   | no                      | 200/120+phot              | no      | COC 4 without coating |

**Table S2.** Properties of all 32 sensors.

| Sample No.                | Hysteresis | Non-repeatability | Maximum measured error | Electrical resistance at room temperature | TCR [ $10^{-3} \text{ K}^{-1}$ ] |
|---------------------------|------------|-------------------|------------------------|-------------------------------------------|----------------------------------|
| R220202y with coating     | 1,4        | 0,6               | 1,2                    | 52,00                                     | 1,31                             |
| R220202y without coating  | 2,5        | 2,7               | 3,1                    | 55,00                                     | 1,29                             |
| R220202B with coating     | 57,2       | 84,0              | 60,6                   | 482,00                                    | 0,16                             |
| R220202B without coating  | 11,1       | 16,5              | 12,5                   | 515,00                                    | 0,15                             |
| R220202z with coating     | 278,8      | 368,5             | 285,4                  | 250,00                                    | 0,36                             |
| R220202z without coating  | 175,3      | 238,2             | 179,3                  | 259,00                                    | 0,36                             |
| R220202C with coating     | 14,3       | 19,8              | 15,2                   | 94,00                                     | 0,85                             |
| R220202C without coating  | 11,2       | 15,2              | 11,8                   | 93,00                                     | 0,89                             |
| R220202D with coating     | 90,1       | 123,0             | 92,3                   | 257,00                                    | 0,30                             |
| R220202D without coating  | 41,6       | 57,6              | 43,6                   | 253,00                                    | 0,32                             |
| R220202A with coating     | 13,9       | 19,3              | 14,6                   | 102,00                                    | 0,84                             |
| R220202A without coating  | 9,6        | 12,6              | 10,0                   | 93,00                                     | 0,89                             |
| R220202F with coating     | 1,4        | 0,8               | 1,1                    | 51,00                                     | 1,21                             |
| R220202F without coating  | 0,5        | 1,4               | 1,2                    | 53,00                                     | 1,20                             |
| R220202v with coating     | 1134,5     | 1248,1            | 1249,8                 | 1200,00                                   | -0,65                            |
| R220202v without coating  | 668,1      | 878,1             | 681,4                  | 280,00                                    | 0,52                             |
| L220215h with coating     | 31,2       | 48,3              | 33,2                   | 89,00                                     | 0,80                             |
| L220215h without coating  | 10,7       | 17,5              | 11,5                   | 83,00                                     | 0,93                             |
| L220215i with coating     | 133,9      | 201,5             | 139,6                  | 258,00                                    | 0,27                             |
| L220215i without coating  | 52,0       | 81,5              | 59,4                   | 244,00                                    | 0,33                             |
| L220215c with coating     | 20,0       | 32,0              | 21,7                   | 41,00                                     | 1,39                             |
| L220215c without coating  | 6,1        | 12,4              | 11,0                   | 42,00                                     | 1,41                             |
| L220215e with coating     | 61,4       | 95,1              | 65,4                   | 89,00                                     | 0,77                             |
| L220215e without coating  | 16,5       | 25,6              | 17,6                   | 93,00                                     | 0,86                             |
| L220215d with coating     | 283,9      | 384,1             | 295,6                  | 139,00                                    | 0,40                             |
| L220215d without coating  | 213,4      | 319,1             | 225,0                  | 216,00                                    | 0,33                             |
| L220202-1 with coating    | 151,1      | 201,2             | 157,9                  | 39,00                                     | 1,22                             |
| L220202-1 without coating | 43,6       | 80,8              | 64,7                   | 40,00                                     | 1,20                             |
| L220215b with coating     | 1054,3     | 1214,7            | 1071,0                 | 545,00                                    | 0,18                             |
| L220215b without coating  | 713,1      | 913,3             | 732,7                  | 543,00                                    | 0,19                             |
| L220202-2 with coating    | 616,4      | 680,0             | 642,3                  | 617,00                                    | 0,94                             |
| L220202-2 without coating | 218,0      | 294,0             | 259,0                  | 724,00                                    | 0,90                             |
